# Supplementary material for: HBx and c-MYC Cooperate to Induce URI1 Expression in HBV-Related Hepatocellular Carcinoma
Source: MDPI journal article supplement (doi:10.3390/ijms20225714), 2019-11-14
Supplement: s1 [file s1]

## Supplementary Figures

### HBx and c-MYC cooperate to induce *URI1* expression in HBV-related hepatocellular carcinoma

Hiroyuki Tsuchiya<sup>1,\*</sup>, Masataka Amisaki<sup>2</sup>, Ai Takenaga<sup>1</sup>, Soichiro Honjo<sup>2</sup>, Yoshiyuki Fujiwara<sup>2</sup> and Goshi Shiota<sup>1</sup>

<sup>1</sup> Division of Molecular and Genetic Medicine, Graduate School of Medicine, Tottori University, 86 Nishi-cho, Yonago, 683-8503, Japan.; tsuchiya@tottori-u.ac.jp (H.T.); M18M9007B@edu.tottori-u.ac.jp (A.T.); gshiota@tottori-u.ac.jp (G.S.)

<sup>2</sup> Division of Surgical Oncology, Department of Surgery, Faculty of Medicine, Tottori University, 86 Nishi-cho, Yonago, 683-8503, Japan.; amisakim@gmail.com (M.A.); honjo@tottori-u.ac.jp (S.H.); y-fujiwara@tottori-u.ac.jp (Y.F.)

\* Correspondence: tsuchiya@tottori-u.ac.jp; Tel/Fax.: +81-859-38-6435

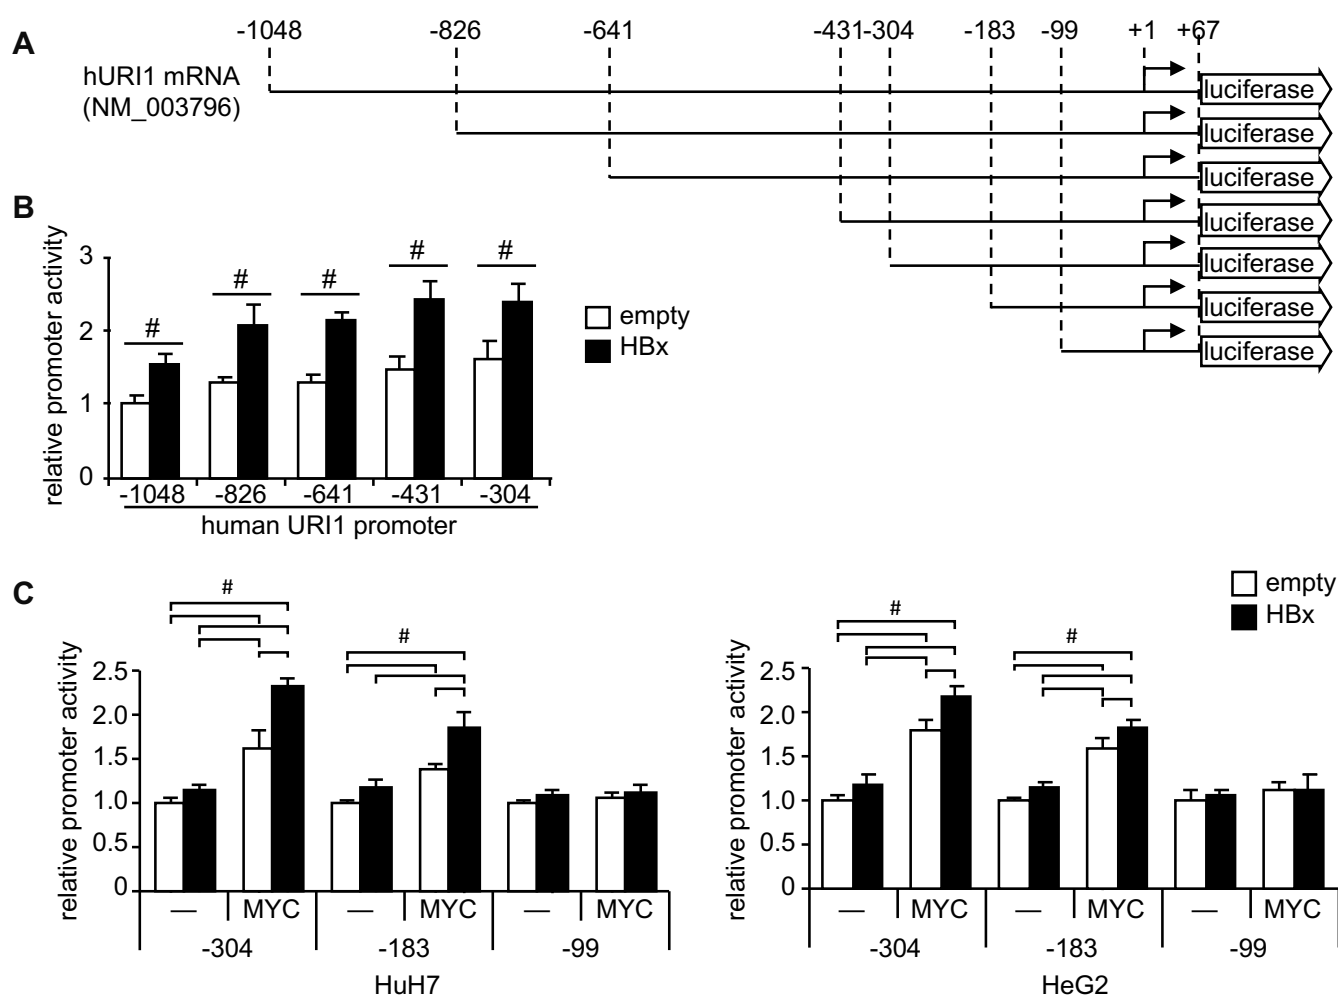

**Supplementary Figure S1.** Reporter assay for the *URI1* promoter. **(A)** Structures of reporter genes. **(B)** Promoter activation by HBx. Data are shown as mean  $\pm$  SD (n = 3–4). #;  $P < 0.05$  was determined by Student's *t*-test. **(C)** Promoter activation by HBx and c-MYC. Data are shown as mean  $\pm$  SD (n = 3–4). #;  $P < 0.05$  was determined by Tukey's test.
